# Supplementary material for: Influence of the Fatty Acid Metabolism on the Mode of Action of a Cisplatin(IV) Complex with Phenylbutyrate as Axial Ligands
Source: MDPI journal article supplement (doi:10.3390/pharmaceutics15020677), 2023-02-16
Supplement: s1 [file s1]

## *Supporting information*

### **Table of Content**

|                                                                                                                   |   |
|-------------------------------------------------------------------------------------------------------------------|---|
| Figure S1. Cell growth of PhB treated cells. ....                                                                 | 2 |
| Figure S2. Cisplatin treatment increases nuclei size. ....                                                        | 3 |
| Figure S3. Flow cytometry data from CT26 and B16 cells using propidium iodide staining after 24 h treatment. .... | 4 |
| Figure S4. Seahorse experiments of CT26 and B16 cells .....                                                       | 5 |
| Table S1. Cell lines used in this manuscript.....                                                                 | 6 |

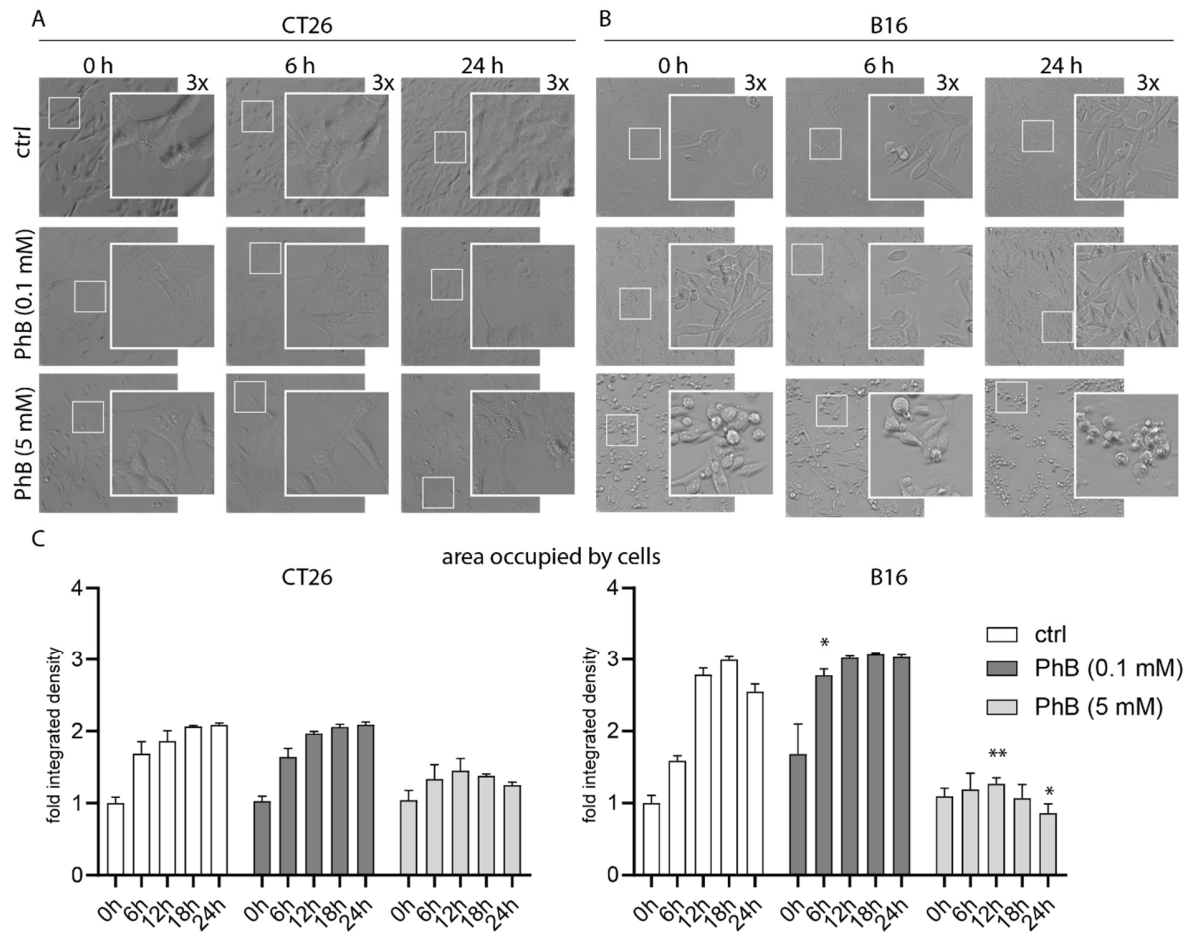

**Figure S1. Cell growth of PhB-treated cells.** Live-cell images show CT26 (A) and B16 (B) cells treated with PhB after various time points (20x and additional 1.5x magnification). (C) Graph shows quantification of the area occupied by cells from (A) and (B). Bars depict mean  $\pm$  SD from two representative images (683x683  $\mu$ m), statistical significance compared to control values was calculated by two-way ANOVA with Sidak's multiple comparison test \* $<0.05$  \*\*  $p < 0.01$ .

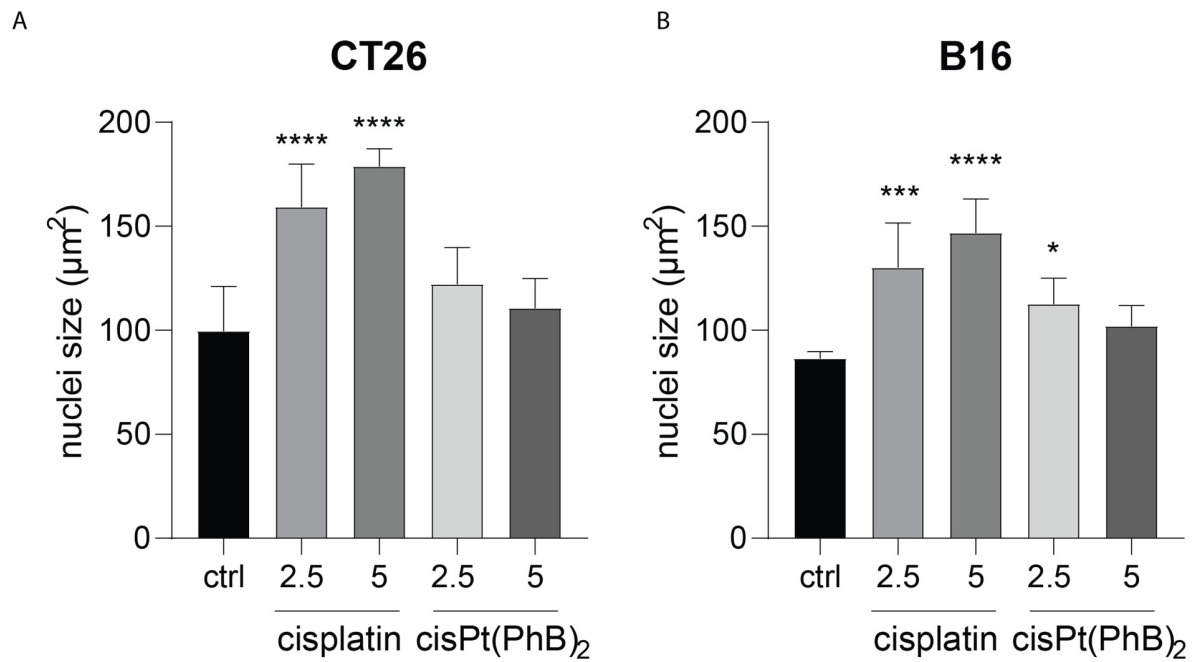

**Figure S2. Cisplatin treatment increases nuclei size.** Graphs show (A) CT26 or (B) B16 average nuclei size from Figure 4 calculated from five images using imageJ particle analysis. Significance was calculated compared to control by ordinary one-way ANOVA and Dunnett's multiple comparisons test. \*  $p < 0.05$ , \*\*\*  $p < 0.001$ , \*\*\*\*  $p < 0.0001$

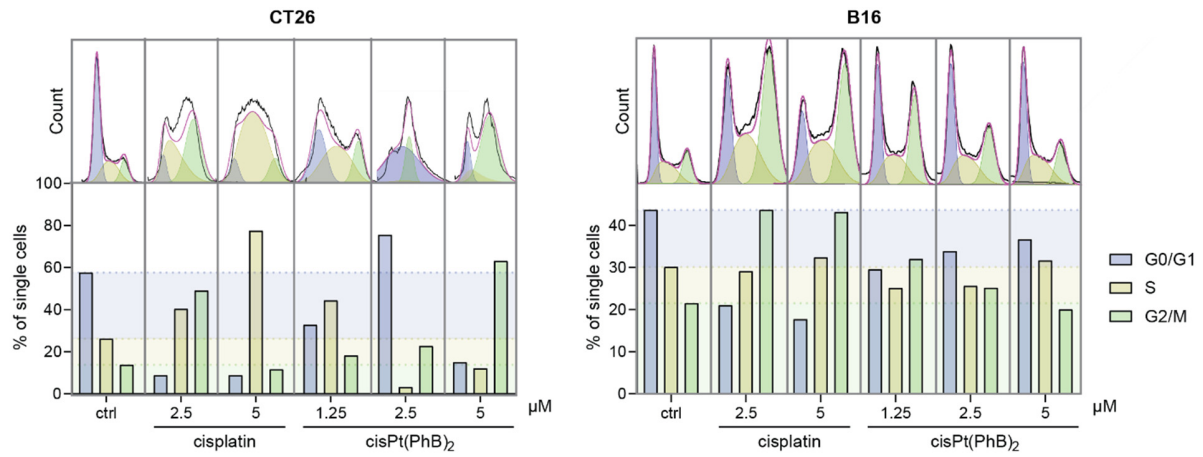

**Figure S3.** Flow cytometry data from CT26 and B16 cells using propidium iodide staining after 24 h treatment. Upper panel shows histograms from one representative experiment, lower graphs show data as mean from two independent experiments.

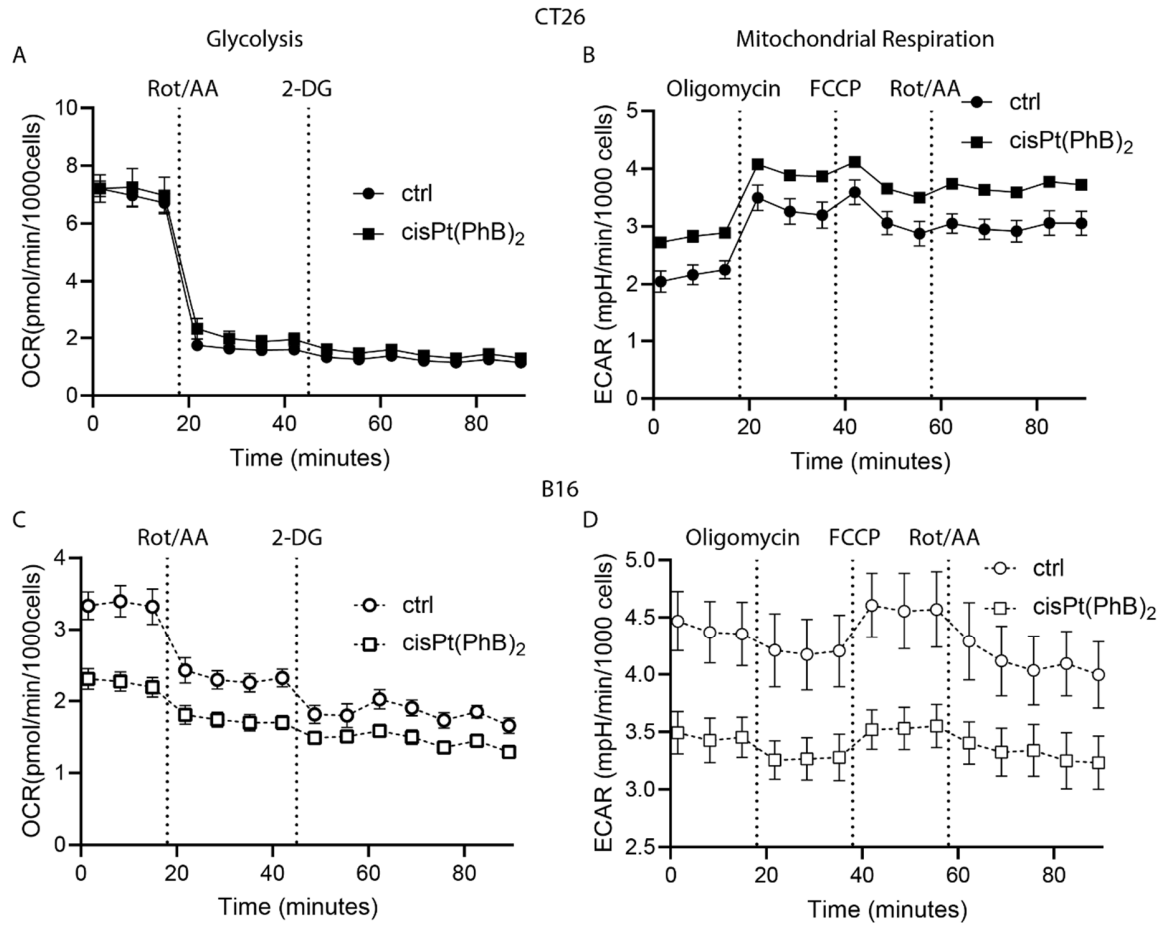

**Figure S4. Seahorse experiments of CT26 and B16 cells.** Graphs show (A, C) OCR in a glycolytic rate assay and (B, D) ECAR in a mitochondria stress test of CT26 and B16 cells measured in real-time Seahorse experiment under basal conditions and in response to indicated mitochondrial inhibitors. Cells are either untreated or pretreated for 4 h with 5  $\mu$ M of cisPt(PhB)<sub>2</sub>.

**Table S1. Cell lines used in this manuscript.**

| Cell line   | Species | Origin               | P53 status | Source                                              | Medium                                                        |
|-------------|---------|----------------------|------------|-----------------------------------------------------|---------------------------------------------------------------|
| HCT116      | h       | colon carcinoma      | Wt         | B. Vogelstein (Johns Hopkins University, Baltimore) | McCoy's 5A                                                    |
| HCT116p53KO | h       | colon carcinoma      | Ko         | B. Vogelstein (Johns Hopkins University, Baltimore) | McCoy's 5A                                                    |
| RKO         | h       | colon carcinoma      | Wt         | E. Selzer (Medical University Vienna)               | McCoy's 5A                                                    |
| RKOp53KO    | h       | colon carcinoma      | Ko         | E. Selzer (Medical University Vienna)               | McCoy's 5A                                                    |
| SW480       | h       | colon carcinoma      | Mut        | ATCC                                                | MEM                                                           |
| CT26        | m       | colon carcinoma      | Wt         | ATCC                                                | DMEM/F12 (1:1)                                                |
| MC38        | m       | colon adenocarcinoma | Mut        | Kerafast, Massachusetts, US                         | DMEM, 10 µl/ml NEAA, 10 µl/ml pyruvate, 1 ml/100 ml glutamine |
| A2780       | h       | ovarian carcinoma    | Wt         | Merck, Darmstadt, Germany                           | RPME-1640                                                     |
| A2780/cisR  | h       | ovarian carcinoma    | Wt         | Merck, Darmstadt, Germany                           | RPME-1640, 1 µM cisplatin                                     |
| SKOV3       | h       | ovarian carcinoma    | Mut        | ATCC                                                | McCoy's 5A                                                    |
| Capan-1     | h       | pancreatic carcinoma | Mut        | ATCC                                                | RPME-1640                                                     |
| PANC-1      | h       | pancreatic carcinoma | Mut        | ATCC                                                | DMEM                                                          |
| VM1         | h       | melanoma metastasis  | Mut        | Vienna, established at ICR                          | RPME-1640                                                     |
| B16         | m       | melanoma             | Mut        | ATCC                                                | RPME-1640                                                     |
| P31         | h       | mesothelioma         | Mut        | K. Grankvist (Umeå University, Sweden)              | MEM                                                           |
| P31/cisR    | h       | mesothelioma         | Mut        | Vienna, established at ICR                          | MEM, 4 µM cisplatin                                           |
| MDA-MB-231  | h       | Breast carcinoma     | Mut        | ATCC                                                | RPME-1640                                                     |

*Abbreviations: American Type Culture Collection (ATCC), Institute of Cancer Research (ICR), minimum essential medium (MEM), Dulbecco's modified Eagle's medium (DMEM), DMEM with Ham's F-12 basal media (DMEM/F12), non-essential amino acid (NEAA), Roswell Park Memorial Institute (RPMI)*
